# Supplementary material for: Carbon nanodot decorated acellular dermal matrix hydrogel augments chronic wound closure
Source: Royal Society of Chemistry journal article supplement (doi:10.1039/d0tb01574a), 2020-01-01
Supplement: d0tb01574a1.pdf [file d0tb01574a1.pdf]

1

## Supporting Information

2

### Carbon Nanodot Decorated Acellular Dermal Matrix Hydrogel

3

### Augments Chronic Wound Closure

4 Kamakshi Bankoti<sup>a</sup>, Arun Prabhu Rameshbabu<sup>a</sup>, Sayanti Datta<sup>a</sup>, Madhurima Roy<sup>b</sup>,  
5 Piyali Goswami<sup>b</sup>, Pallab Datta<sup>c</sup>, Amit Kumar Das<sup>b</sup>, Sudip Kumar Ghosh<sup>b</sup>, Santanu  
6 Dhara<sup>a</sup>

7

8

9 <sup>a</sup>Biomaterials and Tissue Engineering Laboratory

10 School of Medical Science and Technology

11 Indian Institute of Technology Kharagpur

12 Kharagpur – 721302, India

13

14 <sup>b</sup>Department of Biotechnology

15 Indian Institute of Technology Kharagpur

16 Kharagpur – 721302, India

17

18

19 <sup>c</sup>Centre for Healthcare Science and Technology,

20 Indian Institute of Engineering Science and Technology

21 Shibpur, Howrah 711103, India

22

23

24

25

26

27

28 #corresponding author

29 Dr. Santanu Dhara

30 E-mail: [sdhara@smst.iitkgp.ernet.in](mailto:sdhara@smst.iitkgp.ernet.in)

31 **S.1. Quantification of GAG and Collagen.** GAGS were extracted and quantified from NS  
32 and ADM ( $n = 5$ ) using modified AB assay.<sup>1</sup> The GAGs were isolated by digesting NS and ADM  
33 with papain enzyme ( $125 \mu\text{g ml}^{-1}$ ) in phosphate buffer solution (0.1 M, pH 6.8) containing  
34 cysteine hydrochloride (10 mM) and Ethylene diamine tetra acetic Acid (EDTA, 2 mM) (all  
35 chemicals from Sigma-Aldrich, USA) at  $60^\circ\text{C}$  for 60 h. Subsequently, undigested tissue was  
36 removed by collected by centrifugation (13, 000 rpm for 20 min) and sample/standard solution  
37 were mixed with working solution of AB. The absorbance was measured using an iMark™  
38 microplate reader at a wavelength of 595 nm. GAGs in samples was estimated from the standard  
39 curve using chondroitin sulfate A (Sigma-Aldrich, USA).

40 Collagen was measured using the hydroxyproline assay described elsewhere.<sup>2</sup> In brief,  
41 lyophilized tissue (NDM and ADM) was hydrolyzed using 6M HCl (10mg tissue/ml) in an  
42 autoclave ( $120^\circ\text{C}$  for 2-4 h), followed by drying and neutralization. Standards are prepared,  
43 and to both sample & standard, Chloramine-T was added, which was allowed to react for 30  
44 min. Subsequently after addition of 1 ml of aldehyde-perchloric acid reagent, heated at  $60^\circ\text{C}$   
45 for 15min. Samples ( $n=3$ ) were brought to room temperature, and absorbance was recorded at  
46 550 nm. Sample concentration was determined from the standard curve.

47 **S.2. DPPH Assay.** Free radical scavenging property of the hybrid hydrogel was evaluated  
48 using *ex vivo* DPPH (Sigma Aldrich, USA) assay as described in previous reports.<sup>3</sup> Briefly, 0.2  
49  $\text{mg ml}^{-1}$  of methanolic DPPH (300  $\mu\text{l}$ ) solution was added to the samples/ standard (butylated  
50 hydroxyl toluene (BHT)) and incubated in the dark for 1 h 40 min. After 1 h 40 min., OD was  
51 measured by using a UV-Vis Spectrometer (Shimadzu, Japan) at 517 nm. Scavenging (AA) %  
52 was calculated by

$$AA\% = 100 - \frac{(\text{Absorance Sample} - \text{Absorance Blank})}{\text{Absorance Control}} \times 100$$

53  
54 **S.3. Hemolytic assay.** Hemocompatibility of hydrogels was evaluated using direct contact  
55 hemolysis assay.<sup>4</sup> Briefly, uncoagulated blood (3% sodium citrate) was added to sterile saline  
56 (1:1). A different variant of the hydrogel of similar weight was incubated with 1 ml  
57 uncoagulated blood at  $37^\circ\text{C}$  for 60 min, and the supernatant was collected by centrifugation.  
58 OD of the supernatant was measured using Multiskan Spectrophotometer (MK3, Thermo  
59 Scientific, USA) at 540 nm. Normal saline was used as positive control and 1 % Triton-X™  
60 was used as negative control for the study.

61 **% Haemolysis= OD of RBC treated Hydrogel-OD of RBC treated normal saline)/ (OD of**  
62 **RBC treated triton X™ - OD of RBC treated normal saline) X 100**

63 **S.4. Stem Cells and fibroblast isolation.** HAMSCs/Fibroblast were isolated according to our  
64 previous work<sup>5</sup> after taking approval of the Ethical Committee of Indian Institute of  
65 Technology, Kharagpur, India. Briefly, fresh human placentas were collected under the  
66 stringent sterile condition and were washed several times with Hank's Balanced Salt Solution  
67 (HBSS medium, Gibco, USA) containing antibiotic and antimycotic (Invitrogen,  
68 ThermoScientific, USA). Amniotic membrane was dissected from chorion and digested using  
69 0.05 % trypsin–EDTA solution (Gibco, USA) for removal of amniotic epithelial cells for two  
70 cycles 30 min each. The supernatant obtained was discarded, and tissue was washed with  
71 Earle's Balanced Salt Solution (EBSS, Gibco, USA) to remove remaining Trypsin in tissue.  
72 Tissue obtained was further digested using DNase I (10 U ml<sup>-1</sup>, Sigma-Aldrich, USA) and  
73 collagenase Type IV (2 mg ml<sup>-1</sup>, Gibco, USA) for 60 min. Post digestion cell pellet was  
74 collected using centrifugation and suspended in complete low glucose media (Gibco, USA) for  
75 seeding in a flask, followed by transferring in an incubator (37 °C, 5% CO<sub>2</sub>). Post 80 %  
76 confluency the flasks were passaged using 0.25% trypsin–EDTA (Gibco, USA) and cells after  
77 passage 2 was used for the study.

78 For fibroblast isolation human foreskin tissue was collected freshly from volunteer post  
79 written consent and washed several times with PBS containing penicillin (200 U ml<sup>-1</sup> Gibco,  
80 USA) and streptomycin (200 µg ml<sup>-1</sup> Gibco, USA) to get rid of adhering blood and tissue. The  
81 tissue was cut into small pieces and incubated in Dispase II solution (Sigma-Aldrich, USA) at  
82 4 °C for 14-16 h. After incubation, the epidermis was removed from the dermis and discarded.  
83 Dermis so obtained was washed several times with sterile PBS and digested using collagenase  
84 I solution (Gibco, USA) at 37 °C for 2-3 h. The supernatant was collected by filtering through  
85 tissue strainer (100 µm) and the supernatant was centrifuged to collect cell pellet. The cell  
86 pellet was suspended in complete high glucose medium (Gibco, Invitrogen, USA) and seeded  
87 in the flask. Passaging was done after 80 % confluency was obtained using 0.25 % trypsin and  
88 cells were used after the second passage for experiments.

89 **S. 5. Gene Expression.** Animals were sacrificed by an overdose of anesthesia post 21 days of  
90 wounding, and healed tissue (n=3) were retrieved. RT-PCR was performed on retrieved tissue  
91 of all groups. In brief, tissue retrieved was snap froze by dipping in liquid nitrogen and crushed  
92 to powder. Total RNA was isolated using TRIzol reagent (Invitrogen, USA), followed by  
93 transcribing to cDNA using a cDNA synthesis kit (Thermo Fisher Scientific, USA) using the  
94 protocol provided by the manufacturer. PCR gene amplification of specific primers was  
95 performed using cDNA in a thermal cycler (Eppendorf Mastercycler, USA). PCR product was

96 resolved using agarose gel (1%), the picture was taken using UV Gel doc (Bio-Rad, USA), and  
 97 subsequently quantification with Image J (Rasband WS; NIH).

98 **Table S.1** *Primer Sequences*

| Gene         | Forward primer               | Reverse primer             |
|--------------|------------------------------|----------------------------|
| Keratin 10   | 5'-CAGATAGGCCAGCTCTTCAGT-3'  | 5'-GACATCAACGGCCTGCGTA-3'  |
| Collagen I   | 5'-ACATGTTTCAGCTTTGTGGACC-3' | 5'-CATGGTACCTGAGGGCGTTC-3' |
| Collagen III | 5'-ATGTTGTGCAGTTTGCCAC-3'    | 5'-TCGTCCGGGTCTACCTGATT-3' |

99

100 **RESULT:**

101

102

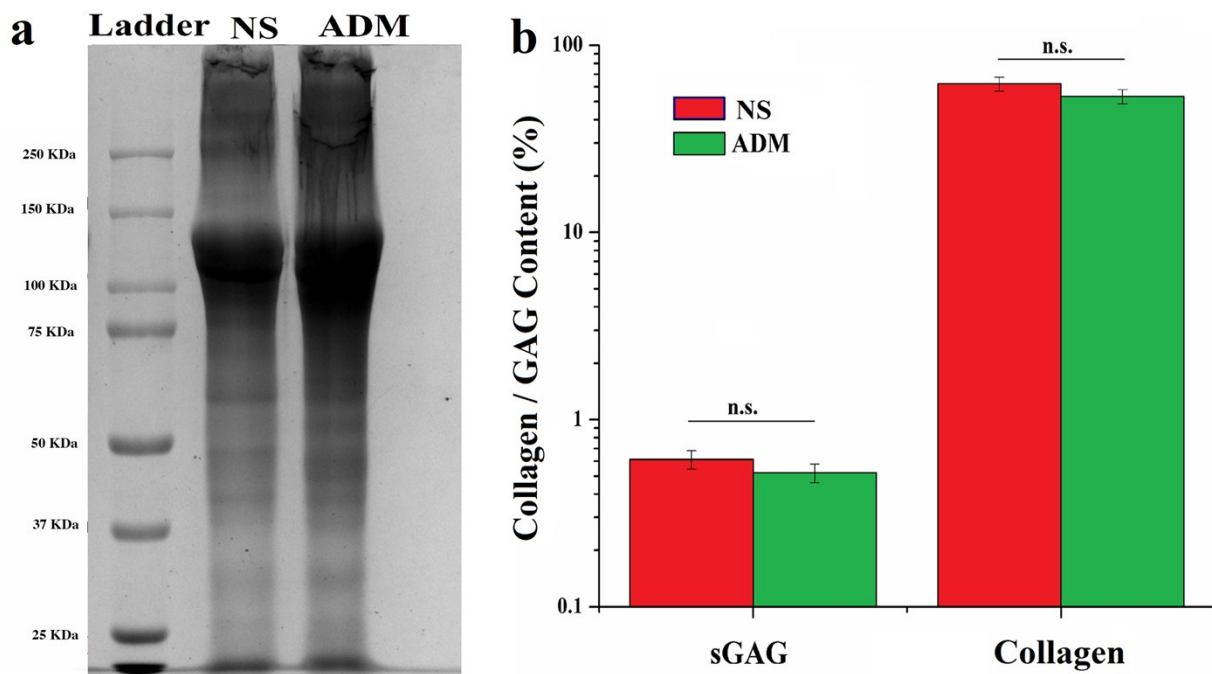

103

104

105 **Fig. S1 (a)** Total protein extracted from NS and ADM was separated by SDS-PAGE and (b)

106 biochemical analysis of Col and glycoaminoglycans (GAG) in NS and ADM. Y-error bars

107 represent standard deviation.

108

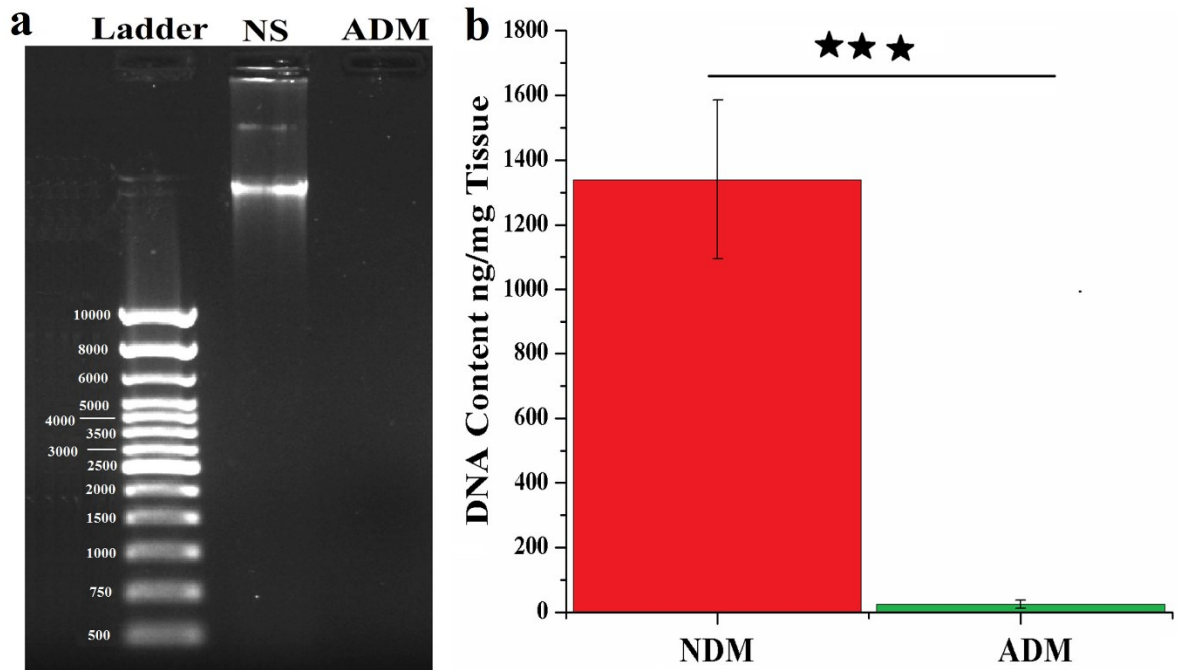

109

110 **Fig. S2** (a) Agarose gel electrophoresis of the isolated DNA from NS and ADM in 1% gel and,  
 111 (b) DNA quantification. Y-error bars represent standard deviation; \*\*\* represents  $p < 0.001$ .

112

113

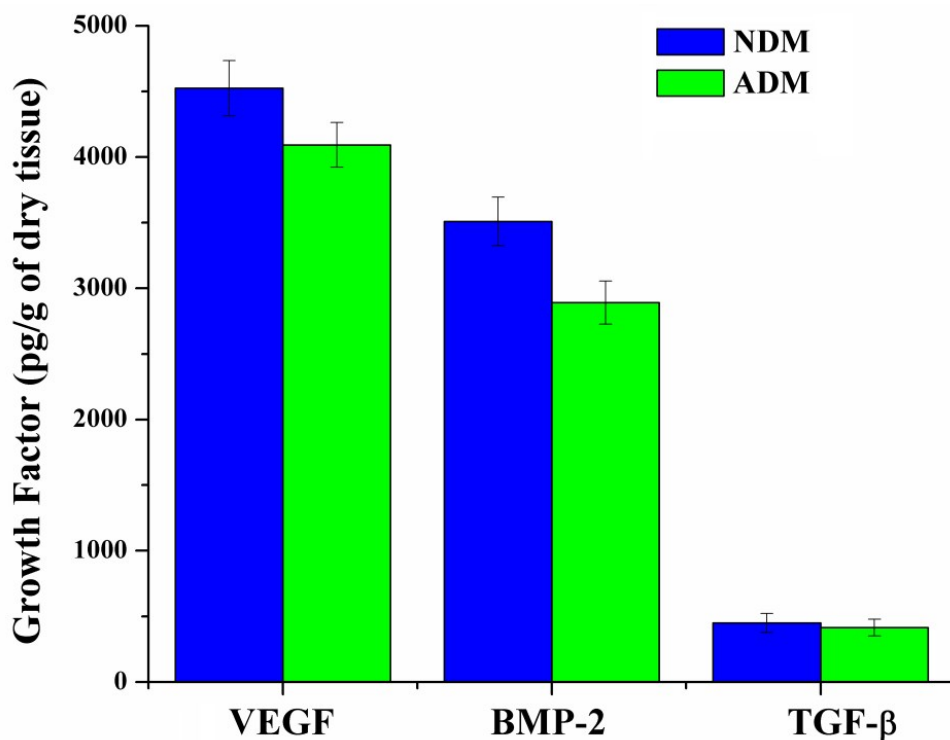

114

115 **Figure S3** Quantitative analysis of different growth factors (VEGF, TGF-β and BMP-2) present in NS  
 116 and ADM using ELISA. Y-error bars represent standard deviation.

117 **References**

- 118 1. Frazier, S. B.; Roodhouse, K. A.; Hourcade, D. E.; Zhang, L. The Quantification of  
119 Glycosaminoglycans: A Comparison of HPLC, Carbazole, and Alcian Blue Methods. *Open*  
120 *Glycosci.* **2008**, *1*, 31–39.
- 121 2. Edwards, C. A.; O’BRIEN, W. D. Modified Assay for Determination of Hydroxyproline in  
122 a Tissue Hydrolyzate. *Clinica Chimica Acta* **1980**, *104*, 161-167.
- 123 3. Zhao, X.; Wu, H.; Guo, B.; Dong, R.; Qiu, Y.; Ma P. X. Antibacterial Anti-Oxidant  
124 Electroactive Injectable Hydrogel as Self- Healing Wound Dressing with Hemostasis and  
125 Adhesiveness for Cutaneous Wound Healing. *Biomaterials* **2017**, *122*, 34–47.
- 126 4. Punnakitikashem, P.; Truong, D.; Jyothi U. Menon, Nguyen, K.T.; Hong, Y. Electrospun  
127 Biodegradable Elastic Polyurethane Scaffolds with Dipyridamole Release for Small  
128 Diameter Vascular Grafts. *Acta Biomaterialia* **2014**, *10*, 4618–4628.
- 129 5. Rameshbabu, A. P.; Bankoti, K.; Datta, S.; Subramani, E.; Apoorva, A.; Ghosh, P.;  
130 Maity, P. P.; Manchikanti, P.; Chaudhury, K.; Dhara, S. Silk Sponges Ornamented with a  
131 Placenta-Derived Extracellular Matrix Augment Full-Thickness Cutaneous Wound Healing  
132 by Stimulating Neovascularization and Cellular Migration. *ACS Appl. Mater. Interfaces*  
133 **2018**, *10*, 16977–16991.
- 134  
135  
136  
137  
138  
139  
140  
141  
142  
143  
144  
145  
146
